# Supplementary material for: Multiple cancer pathways regulate telomere protection
Source: PubMed Central journal article supplement (PMC6609915; doi:10.15252/emmm.201910292), 2019-06-13

B

SMC1

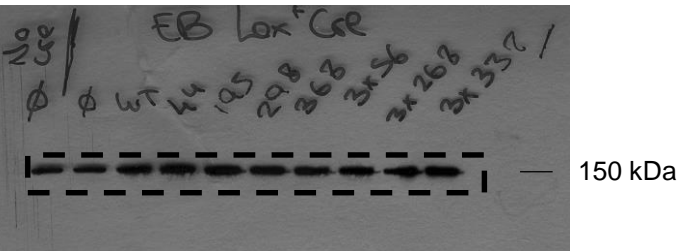

TRF1

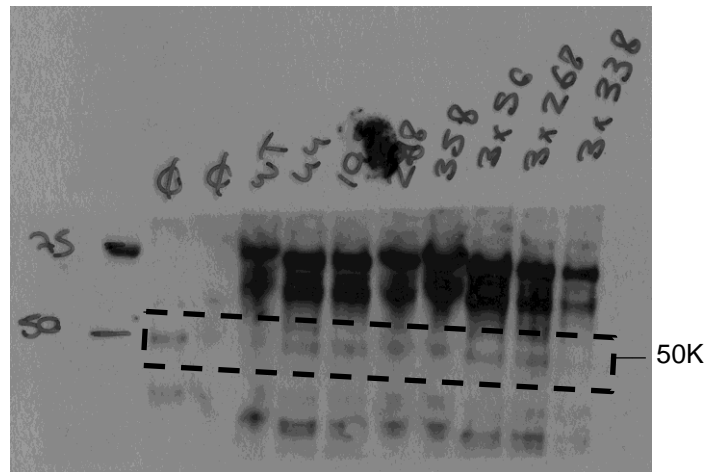

TRF1 GFP

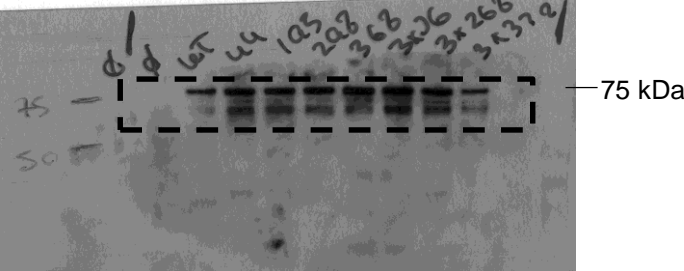

E

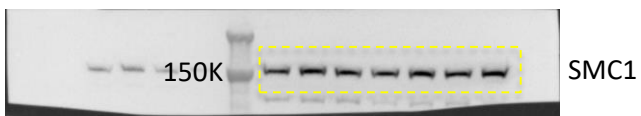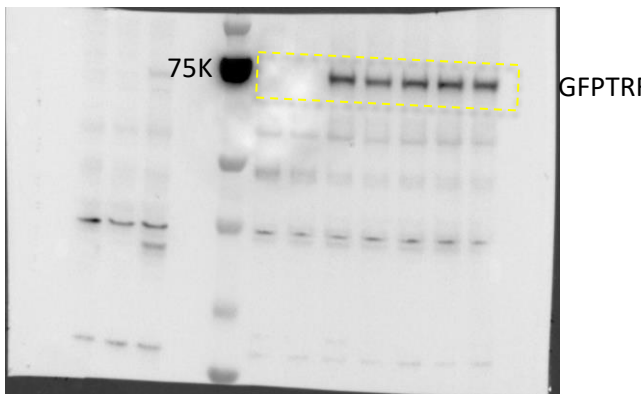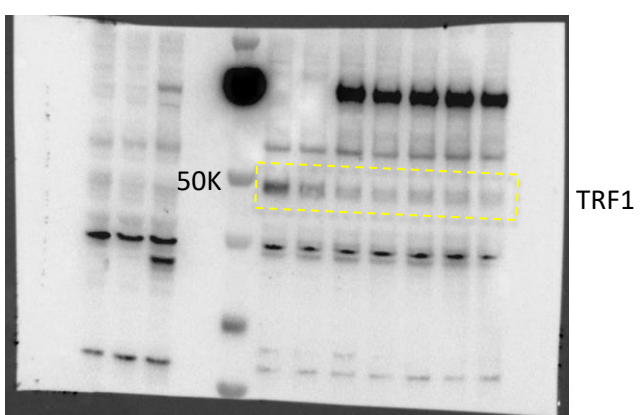

H

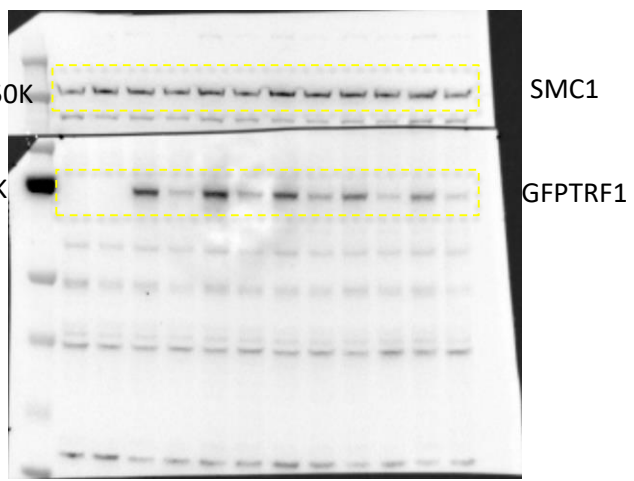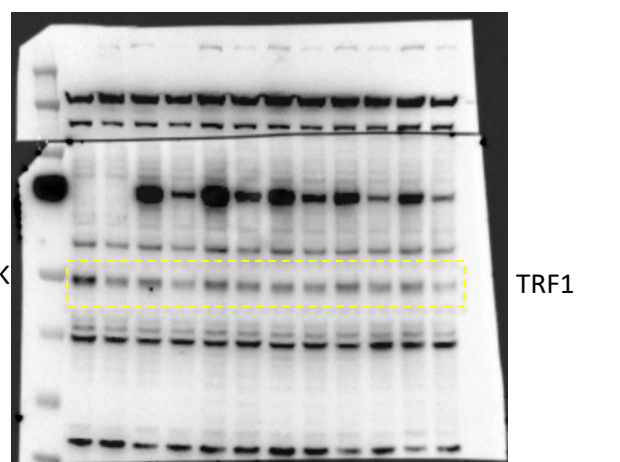

Supplement: EMMM-11-e10292-s005.pdf [file EMMM-11-e10292-s005.pdf]
