# Supplementary material for: Multiple cancer pathways regulate telomere protection
Source: PubMed Central journal article supplement (PMC6609915; doi:10.15252/emmm.201910292), 2019-06-13

### SMC1

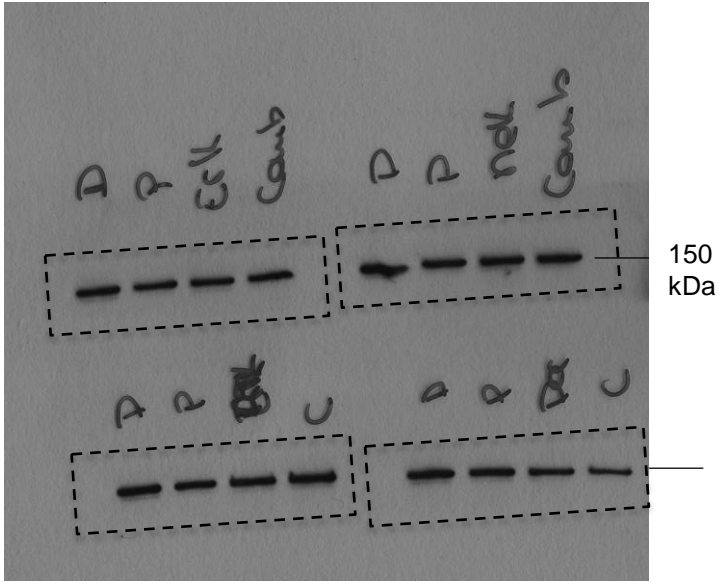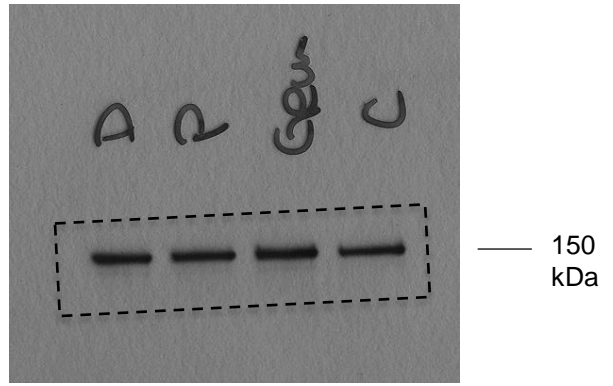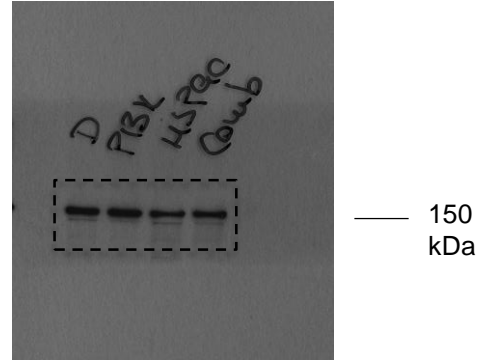

### TRF1

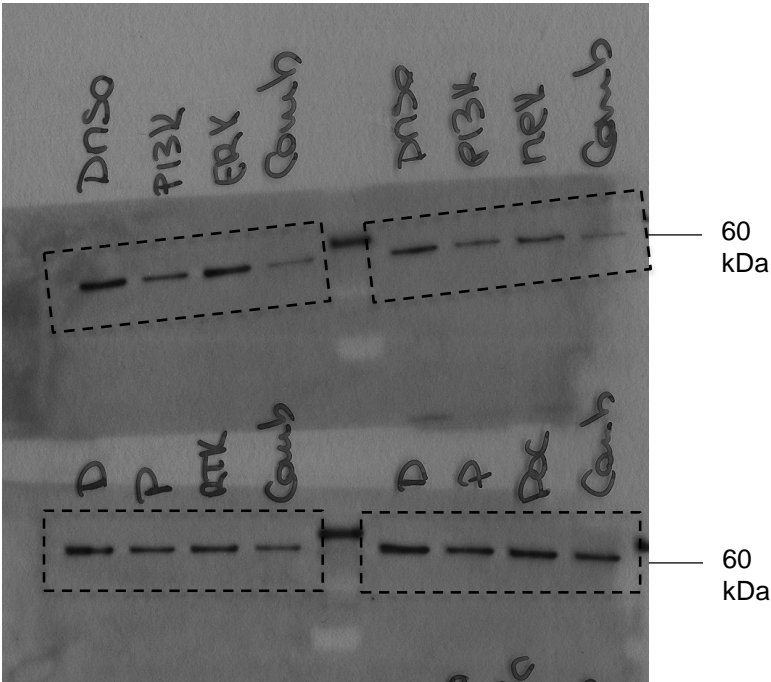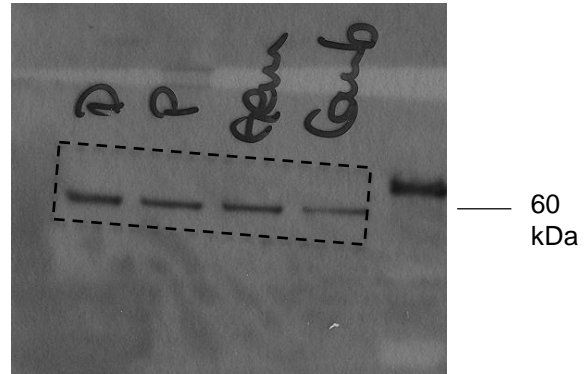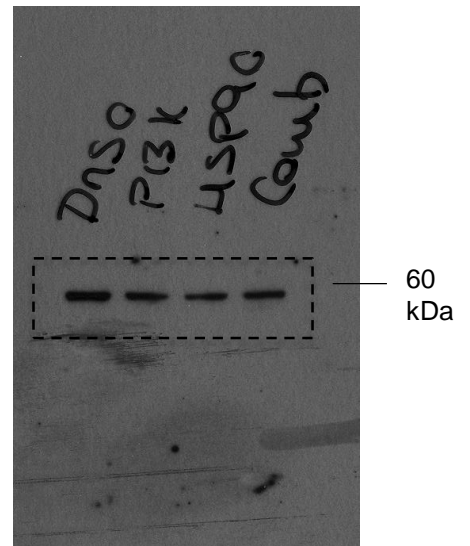

Supplement: EMMM-11-e10292-s007.pdf [file EMMM-11-e10292-s007.pdf]
